1 **A developmental gene regulatory network for invasive differentiation of the *C.***  
2 ***elegans* anchor cell**

3

4 Taylor N. Medwig-Kinney\*, Jayson J. Smith\*, Nicholas J. Palmisano, Wan Zhang and  
5 David Q. Matus<sup>‡</sup>

6

7 Department of Biochemistry and Cell Biology, Stony Brook University, Stony Brook, NY  
8 11794-5215, USA.

9

10

11 \*These authors contributed equally to this work

12

13 ‡Author for correspondence (david.matus@stonybrook.edu)

14

15

16

17

18

19

20

21

22

23

24

25

26

27

28

29

30

31

32 **SUMMARY STATEMENT**

33

34 Basement membrane invasion by the *C. elegans* anchor cell is coordinated by a gene  
35 regulatory network encompassing overlapping cell cycle dependent and independent  
36 sub-circuits.

37

38 **ABSTRACT**

39

40 Cellular invasion through the basement membrane is a key part of fertility, development,  
41 immunity, and disease. To understand the acquisition of the invasive phenotype, we use  
42 the genetically tractable *in vivo* model of *C. elegans* anchor cell invasion into the vulval  
43 epithelium. Coordination of AC invasive machinery is largely achieved cell  
44 autonomously through the activity of four conserved transcription factors (TFs), *fos-1a*  
45 (*Fos*), *egl-43* (*EVI/MEL*), *hlh-2* (*E/Daughterless*) and *nhr-67* (*NR2E1/TLX*). Here, using  
46 genome editing and protein depletion with improved RNA interference (RNAi), we  
47 characterize the gene regulatory network (GRN) programming AC invasion. Using  
48 quantitative measures of endogenous protein levels paired with perturbation analyses,  
49 we identify the upstream regulation of *nhr-67* activity by *egl-43* and *hlh-2*. Network  
50 inference suggests that these three TFs function in a type I coherent feed-forward loop  
51 with positive feedback to maintain the AC in a post-mitotic, pro-invasive state. Finally,  
52 we provide evidence that two overlapping pro-invasive sub-circuits function in a cell  
53 cycle-dependent and independent fashion. Together, these results provide the first  
54 framework for integrating TF relationships with the cell biological mechanisms driving  
55 invasive cellular behavior.

56

57 **Key words:** EGL-43, FOS-1, HLH-2, NHR-67, gene regulatory network, cell invasion

58

59

60

61

62

63 **INTRODUCTION**

64

65 Invasion through basement membranes (BM) is a cellular behavior integral to the  
66 establishment of pregnancy, tissue patterning during embryonic development, and  
67 immune response to infection and injury (Medwig and Matus, 2017; Rowe and Weiss,  
68 2008). Increased cellular invasiveness is also a hallmark of metastatic cancer (Hanahan  
69 and Weinberg, 2011). Previous research has identified several cell-autonomous  
70 mechanisms that are highly conserved across different contexts of BM invasion (Kelley  
71 et al., 2014; Medwig and Matus, 2017). These include expression of extracellular matrix  
72 (ECM) proteins to facilitate cell-BM adhesion, localization of F-actin into invasive  
73 protrusions that physically puncture the BM, as well as upregulation of matrix  
74 metalloproteinases (MMPs) to chemically degrade the BM (Hagedorn et al., 2009;  
75 Hagedorn et al., 2013; Kelley et al., 2018; Morrissey et al., 2014; Sherwood et al.,  
76 2005). There is also growing evidence that cells must undergo cell cycle arrest in order  
77 to achieve invasive differentiation (Kohrman and Matus, 2017; Matus et al., 2015). How  
78 these tightly coordinated programs are transcriptionally regulated is not well understood.

79

80 As many contexts of cellular invasion occur deep within tissue layers where it is difficult  
81 to visualize, we utilize morphogenesis of the *C. elegans* uterine-vulval connection as a  
82 genetically tractable and visually amenable model for examining cell invasion *in vivo*.  
83 During the mid-L3 stage, a specialized uterine cell called the anchor cell (AC), invades  
84 through the underlying BM in order to connect the uterus to the vulval epithelium,  
85 facilitating egg-laying (Sherwood and Sternberg, 2003). The AC itself is specified in a  
86 cell fate decision event earlier in development, during the L2 stage, where two  
87 equipotent cells diverge via stochastic Notch asymmetry, giving rise to the terminally  
88 differentiated AC and a proliferative ventral uterine (VU) cell (Wilkinson et al., 1994).

89

90 Prior research has identified four pro-invasive transcription factors (TFs) that function  
91 cell autonomously to regulate AC invasion (Fig. 1). These include the basic leucine  
92 zipper TF *fos-1a* (Fos), the basic helix-loop-helix TF *hlf-2* (E/Daughterless), the nuclear  
93 hormone receptor *nhr-67* (NR2E1/Tailless/TLX) and the zinc-finger TF *egl-43*

94 (EVI1/MEL1) (Hwang et al., 2007; Matus et al., 2010; Rimann and Hajnal, 2007;  
95 Schindler and Sherwood, 2011; Sherwood et al., 2005; Verghese et al., 2011). NHR-67  
96 functions upstream of the cyclin dependent kinase inhibitor, CKI-1 (p21/p27), to induce  
97 G1/G0 cell cycle arrest, which is necessary for AC invasion (Matus et al., 2015).  
98 Independent of NHR-67 activity, FOS-1A regulates the expression of the long isoform of  
99 *egl-43* (EGL-43L) and downstream effectors including multiple MMPs (*zmp-1*, *-3*, and  
100 *6*), a cadherin (*cdh-3*), and hemicentin (*him-4*), an immunoglobulin superfamily protein  
101 that generates a linkage between the ventral epidermal and somatic gonad BMs during  
102 invasion (Hwang et al., 2007; Kelley et al., 2018; Matus et al., 2010; Morrissey et al.,  
103 2014; Rimann and Hajnal, 2007). HLH-2 independently regulates *cdh-3* and *him-4* as  
104 well as an ECM glycoprotein (MIG-6/papilin) and cytoskeletal polarity (Schindler and  
105 Sherwood, 2011). Prior work has additionally suggested that EGL-43 and HLH-2 may  
106 regulate NHR-67 based on binding motifs present in the *nhr-67* promoter (Bodofsky et  
107 al., 2018; Verghese et al., 2011). How these four TFs function, both independently and  
108 together, to regulate the invasive activity of the AC is poorly understood.

109  
110 Here, using new highly efficient RNA interference (RNAi) vectors (Sturm et al., 2018),  
111 we identify previously unreported AC invasion phenotypes associated with depletion of  
112 *egl-43* and *hlh-2*. In addition, using CRISPR/Cas9-genome engineering, we have  
113 endogenously GFP-tagged the genomic locus of each TF, allowing us to report both the  
114 relative expression of pro-invasive TFs in the AC and dissect their molecular epistatic  
115 interactions. Based on these findings, we have characterized cell cycle dependent and  
116 independent pathways necessary for invasion. Finally, we have identified a feed-forward  
117 regulatory circuit with positive feedback critical for maintaining the AC in a pro-invasive,  
118 post-mitotic state. These findings provide new insights into the GRN that underlies  
119 invasive cell behavior.

120

## 121 RESULTS

122

123 ***Improved RNAi penetrance reveals new phenotypes associated with depletion of***  
124 ***pro-invasive TFs***



125 *C. elegans* AC invasion is a simple, tractable *in vivo* model for understanding how cells  
126 breach the barriers imposed by BM (Gupta et al., 2012; Sherwood and Plastino, 2018).  
127 We and others have identified four TFs that function cell autonomously in the AC to  
128 regulate invasion (Hwang et al., 2007; Matus et al., 2015; Rimann and Hajnal, 2007;  
129 Schindler and Sherwood, 2011; Sherwood et al., 2005). Recently, we identified that the  
130 post-mitotic AC must be in a G1/G0-cell cycle arrested state, regulated by *nhr-67*, in  
131 order to adopt an invasive phenotype (Fig. 1) (Matus et al., 2015). Roles for the other  
132 three TFs in AC specification (*egl-43* and *hlh-2*) (Hwang et al., 2007; Karp and  
133 Greenwald, 2004; Rimann and Hajnal, 2007; Sallee et al., 2017; Verghese et al., 2011)  
134 and the transcriptional regulation of downstream invasive effectors, including MMPs  
135 (*fos-1a* and *egl-43*) and other pro-invasive targets, have been previously established  
136 (Fig. 1A) (Bodofsky et al., 2018; Kelley et al., 2018; Matus et al., 2010; Matus et al.,  
137 2015; Schindler and Sherwood, 2011; Sherwood et al., 2005; Wang et al., 2014). Here,  
138 we sought to gain a deeper understanding of the regulatory relationships between pro-  
139 invasive TFs in the AC, taking advantage of recent advances in RNAi targeting (Sturm  
140 et al., 2018) and CRISPR/Cas9-genome engineering (Dickinson and Goldstein, 2016).  
141 To accomplish this, we first generated new RNAi targeting constructs in the improved  
142 RNAi vector, T444T, which includes T7 termination sequences to prevent the  
143 generation of non-specific RNA fragments from the vector backbone, increasing the  
144 efficacy of gene silencing over the original RNAi targeting vector, L4440 (Sturm et al.,  
145 2018).

146  
147 As three of four pro-invasive TFs also function during AC specification (Hwang et al.,  
148 2007; Karp and Greenwald, 2004; Verghese et al., 2011), we scored TF depletions in a  
149 genetic background where only the AC and neighboring uterine cells are sensitive to  
150 RNAi. The uterine-specific RNAi sensitive strain was generated through tissue-specific  
151 restoration of the RDE-1 Piwi/Argonaut protein in an *rde-1* mutant background using the  
152 *fos-1a* promoter, which is expressed specifically in the somatic gonad during the late  
153 L2/early L3 stage of larval development (Haerty et al., 2008; Hagedorn et al., 2009;  
154 Matus et al., 2010; Matus et al., 2015). AC invasion was quantified as the presence or  
155 absence of a BM gap, visualized by laminin::GFP, at the P6.p four-cell stage, a

156 developmental window where 100% of wild-type ACs are invaded (Fig. 2). We also  
157 scored invasion several hours later, following vulval morphogenesis, allowing us to  
158 distinguish between delays in invasion and complete loss of invasive capacity (Fig. 2B,  
159 Fig. S1, Table S1). Depletion of each TF resulted in invasion defects ranging from  
160 moderate penetrance (38%, *fos-1*) to highly penetrant (69-94%, *hlh-2*, *egl-43*, and *nhr-*  
161 *67*), when synchronized L1-stage animals were plated on RNAi-containing bacteria and  
162 scored at the mid-L3 stage (P6.p 4-cell stage) and early L4 stage (P6.p 8-cell stage)  
163 (Fig. 2, Fig. S1). Consistent with previous work, depletion of *fos-1* resulted in single ACs  
164 that failed to breach the BM. Depletion of *nhr-67* resulted in proliferative, non-invasive  
165 ACs at high penetrance. Interestingly, depletion of *egl-43* phenocopied *nhr-67*, with a  
166 highly penetrant defect of multiple, non-invasive ACs. Lastly, loss of *hlh-2* resulted in a  
167 range of phenotypes, from animals with zero, one, two or even several cases of three or  
168 more ACs (Fig. S1B,C). In all cases, the penetrance of AC invasion defects was  
169 significantly increased using a T444T-based RNAi targeting vector as compared to  
170 L4440-based vectors (Fig. S1A). Thus, use of the improved RNAi vector revealed  
171 potentially novel phenotypes for depletion of *egl-43* and *hlh-2* during invasion.

172  
173 As we did see a range of phenotypes in *hlh-2* depleted animals, including animals  
174 possessing multiple ACs, we wanted to rule out any potential defects in AC  
175 specification. Depletions using the traditional RNAi vector, L4440, in the uterine-specific  
176 RNAi-sensitive background is sufficient to bypass AC fate specification defects that  
177 occur in genetic backgrounds where all cells are sensitive to RNAi (Matus et al., 2010).  
178 Specifically, loss of HLH-2 prior to AC specification regulates the *lin-12*(Notch)/*lag-*  
179 *2*(Delta)-dependent signaling cascade, resulting in both pre-AC/VU cells adopting a VU  
180 fate. Later, loss of HLH-2 during AC specification results in upregulation of pro-AC fate  
181 by activating *lag-2*/Delta resulting in both AC/VU cells adopting an AC fate (Karp and  
182 Greenwald, 2004; Schindler and Sherwood, 2011). Notably, *hlh-2* depletion using the  
183 more penetrant T444T vector resulted in a significantly greater occurrence of a 0 AC  
184 phenotype as compared to an L4440 *hlh-2* RNAi clone (Fig. S1A-C). To bypass  
185 specification defects due to increased RNAi penetrance for *hlh-2* using the T444T  
186 vector, we depleted *hlh-2* by RNAi using an L2-plating strategy, growing animals to the

187 time of the L1/L2 molt and then transferring them to *hlh-2(RNAi)* plates. The L2 plating  
188 resulted in a lower penetrance overall of AC invasion defects (43% at the P6.p 4-cell  
189 stage; Fig. 2, Fig. S1C), but all animals possessed an AC. Strikingly, multiple animals  
190 possessed multiple *cdh-3*-expressing ACs early (Fig. 2), while 10% of animals in the  
191 early L4 stage possessed multiple ACs (Fig. 2B, Fig. S1C,D). As the number of ACs  
192 increased over developmental time (Fig. 2B, Fig. S1C,D), these results suggest that the  
193 multiple ACs could be arising through loss of G1/G0-cell cycle arrest and *nhr-67* activity  
194 (Matus et al., 2015).

195

196 ***Generation of GFP-tagged proteins to establish a quantitative framework for***  
197 ***examining TF interactions***

198

199 Next, we sought to examine the relationship of these four TFs in the AC prior to and  
200 during invasion. To do this in a quantitative fashion, we used CRISPR/Cas9-genome  
201 editing technology to knock-in a codon-optimized GFP tag into the endogenous locus of  
202 each TF (Fig. S2) (Dickinson and Goldstein, 2016; Dickinson et al., 2013; Dickinson et  
203 al., 2015). All four TFs showed robust GFP-localization in the AC nucleus prior to and  
204 during invasion (Fig. 3A). Additionally, the GFP-tagged strains had similar expression  
205 domains in the somatic gonad during the L3 larval stage as previously reported by  
206 traditional multi-copy array transgenes (Hwang et al., 2007; Matus et al., 2015; Rimann  
207 and Hajnal, 2007; Sherwood et al., 2005; Verghese et al., 2011). After examining  
208 expression patterns, we then synchronized TF GFP-tagged strains and collected a  
209 developmental time-course quantifying the expression of GFP-tagged protein in the AC  
210 at the P6.p 1-cell, 2-cell, 4-cell and 8-cell stages (Fig 3A). All GFP-tagged TFs were  
211 imaged using uniform acquisition settings on a spinning disk confocal using an EM-CCD  
212 camera, allowing us to compare relative expression levels of endogenous GFP-tagged  
213 proteins. Interestingly, all four TFs followed the same general trend in expression levels,  
214 with a gradual increase in levels prior to invasion, peaking at or just before the P6.p 4-  
215 cell stage when 100% of wild-type animals have generated a gap in the BM. Expression  
216 levels then decreased following invasion, during vulval morphogenesis in the early L4  
217 stage (P6.p 8-cell stage) (Fig. 3B).

218

219 ***Correlating phenotypes to quantitative loss of endogenous TFs***

220

221 We next wished to assess the efficacy of our newly generated TF-RNAi vectors  
222 quantitatively. To accomplish this, we first crossed a BM reporter (laminin::GFP) and an  
223 AC marker (*cdh-3>mCherry:moeABD*) into each endogenously GFP-tagged TF strain.  
224 We then performed a series of RNAi depletion experiments targeting each TF and  
225 examining synchronized animals at the P6.p 4-cell stage. As the insertion of GFP-tags  
226 into native genomic loci can potentially interfere with gene function, we examined a  
227 minimum of 50 animals treated with control (T444T) empty vector RNAi (Fig. 4). All four  
228 GFP-tagged strains showed 100% BM breach at the normal time of invasion in control  
229 animals (empty vector) (Fig. 4). Next, we examined a minimum of 50 animals following  
230 targeted TF-RNAi depletions, collecting spinning disk confocal z-stacks using the same  
231 acquisition settings as used for the developmental series (Fig. 3) in all experiments.  
232 Following image quantification, our results were consistent with the phenotypes  
233 identified in our original uterine-specific RNAi screen (Fig. 2,4). However, by being able  
234 to quantify loss of endogenous GFP-tagged TF targeted by RNAi, we were more  
235 accurately able to correlate phenotype with protein depletion. The *nhr-67* and *egl-43*  
236 improved RNAi constructs strongly knocked down their GFP-tagged endogenous  
237 targets, with depletions averaging 88% and 75%, respectively (Fig. 4E). This strong  
238 knockdown of *nhr-67* and *egl-43* was also correlated with a highly penetrant AC  
239 invasion defects (61% and 100%, respectively). The completely penetrant defect from  
240 *egl-43(RNAi)* segregated into 26% of animals exhibiting a single AC that failed to invade  
241 and the remaining phenocopying loss of *nhr-67*, with multiple *cdh-3*-expressing non-  
242 invasive ACs (Fig. 4A,E). RNAi depletion of *GFP::fos-1a* was also penetrant, with a  
243 mean depletion of 92% and 76% of treated animals exhibiting a block in AC invasion  
244 (Fig. 4B,E). To assess post-AC specification phenotypes following *hlh-2* knockdown, we  
245 performed L2 platings and scored for defects. As the animals experience ~12 hours (at  
246 25°C) less time exposed to *hlh-2(RNAi)*, we were not surprised to see relatively weaker  
247 *GFP::hlh-2* depletion as compared to L1 platings targeting the other TFs (Fig. 4E).  
248 However, this shorter time of depletion revealed a strong correlation between invasion

249 defect and percent protein depletion. Animals with ~50% depletion appeared wild-type,  
250 with a single AC that breached the BM. Animals with stronger depletion in the AC  
251 presented pleiotropic phenotypes, much like *egl-43(RNAi)* (Fig. 4C,E). Notably, the  
252 average depletion for animals with a single non-invasive AC was weaker than for  
253 animals with multiple *cdh-3*-expressing non-invasive ACs (60% vs. 78% respectively,  
254 Fig. 4D,E). These results suggest that following strong TF depletion, loss of either *egl-*  
255 *43* or *hlh-2* phenocopy *nhr-67* depletion, generating multiple, non-invasive ACs.

256

### 257 **Identification of a feed-forward loop controlling NHR-67 activity**

258

259 Next, we examined the relationship between the four pro-invasive TFs during invasion.  
260 To accomplish this, we performed a series of RNAi depletion experiments using  
261 synchronized L1 or L2 (for *hlh-2*) stage animals and quantified the amount of GFP-  
262 tagged endogenous TF in the AC in animals with defects in invasion. While depletion of  
263 *fos-1* failed to significantly down-regulate levels of *nhr-67::GFP*, loss of *egl-43* resulted  
264 in a strong reduction (65%) of *nhr-67::GFP* in the AC (Fig. 5A,B). Intriguingly, in animals  
265 with a single non-invasive AC following *hlh-2(RNAi)*, we saw only a partial reduction  
266 (19%) of *nhr-67::GFP* levels, while in animals with multiple *cdh-3*-expressing cells we  
267 saw a significant reduction (49%) in *nhr-67::GFP* (Fig. 5A,B). These results suggest that  
268 both *egl-43* and *hlh-2* co-regulate *nhr-67* during invasion.

269

270 We repeated these TF-RNAi molecular epistasis experiments with the remaining three  
271 TF-GFP-tagged strains and quantified loss of GFP in animals with invasion defects.  
272 Consistent with previous studies using transcriptional GFP promoter reporters (Hwang  
273 et al., 2007; Rimann and Hajnal, 2007), we found that depletion of *fos-1* regulated levels  
274 of *egl-43::GFP::egl-43* (44% depletion) (Fig. 5C,D). No other TF depletion significantly  
275 regulated the levels of *egl-43* in our experiments (Fig. 5C,D). *hlh-2* is predicted to  
276 regulate *egl-43* activity based on the presence of two conserved E-box binding motifs in  
277 the *egl-43* promoter (Hwang et al. 2007). We did not detect regulation of *egl-*  
278 *43::GFP::egl-43* in either the AC (Fig. 5C,D) or neighboring ventral uterine (VU) cells  
279 (Fig. S3), but as our experiments with *hlh-2* depletion were done as L2 platings post-AC

280 specification, it is possible that *hlh-2* might regulate *egl-43* prior to AC/VU specification.  
281 Next, we examined *GFP::hlh-2* levels following TF-RNAi depletions. Intriguingly, we  
282 found a similar pattern of regulation based on AC phenotype. Animals with single non-  
283 invasive ACs showed partial depletion of *GFP::hlh-2* following *fos-1*, *egl-43*, or *nhr-67*  
284 loss (35%, 20%, and 14%, respectively). However, animals with multiple *cdh-3*-  
285 expressing ACs following *egl-43(RNAi)* or *nhr-67(RNAi)* showed strong depletion of  
286 *GFP::hlh-2* (66% and 73%, respectively) (Fig. 5E,F). Finally, we examined levels of  
287 *GFP::fos-1a* following TF depletions. Loss of either *nhr-67* or *egl-43* resulted in partial  
288 reduction of *GFP::fos-1a* levels in the AC (52% and 49%, respectively) (Fig. 5G,H).  
289 Together, these results suggest that *egl-43*, *hlh-2* and *nhr-67* may function together in a  
290 feed-forward regulatory loop with positive feedback to maintain the AC in a post-mitotic,  
291 pro-invasive state.

292

### 293 ***Multiple ACs derive from proliferation***

294

295 As loss of *egl-43* and *hlh-2* both regulate levels of *nhr-67* and their depletion results in  
296 multiple ACs that fail to invade, we next wanted to assess whether their depletion was  
297 functionally phenocopying loss of *nhr-67*. To confirm that the presence of multiple cells  
298 expressing the *cdh-3*-driven AC reporter were due to defects in proliferation, we  
299 performed static imaging using a full-length translational *cdt-1>CDT-1::GFP* reporter  
300 that indicates cell cycle progression (Fig. 6A). As CDT-1 must be removed from origins  
301 of replication during DNA licensing, the transgene localizes to the nucleus during G1/G0  
302 and is largely cytosolic at the onset of S phase (Matus et al., 2014; Matus et al., 2015).  
303 As expected, T444T (empty vector) and *fos-1(RNAi)* treated animals consistently  
304 exhibited nuclear localization of CDT-1::GFP (Fig. 6A;  $n \geq 14$  examined for each),  
305 indicating cell cycle arrest. However, following depletion of *egl-43*, *hlh-2* and *nhr-67* we  
306 identified multiple animals (Fig. 6A,  $n \geq 10$  for each RNAi) possessing non-invasive ACs  
307 lacking nuclear CDT-1::GFP, indicative of cycling ACs. Together, these results strongly  
308 support our molecular epistasis data suggesting that *egl-43* and *hlh-2* function upstream  
309 of *nhr-67* to maintain the post-mitotic state of the AC during invasion.

310



311 ***EGL-43 plays a role in cell cycle dependent and independent pro-invasive***  
312 ***pathways***

313  
314 We have shown previously that the invasive activity of the AC following loss of NHR-67  
315 can be completely rescued by restoring the AC to a post-mitotic G1/G0 state through  
316 upregulation of the cyclin-dependent kinase inhibitor, CKI-1 (p21/p27) (Matus et al.,  
317 2015). As our epistasis experiments revealed that *egl-43* and *hlh-2* positively co-  
318 regulate NHR-67 activity, we induced AC-specific expression of CKI-1 using a *cdh-*  
319 *3>CKI-1::GFP* integrated array and assessed invasion following RNAi depletions (Fig.  
320 6B,C). As previously reported, induced localization of CKI-1::GFP in the AC completely  
321 rescued *nhr-67(RNAi)* treated animals (Fig. 6B,C; 100% invaded (n=42) as compared to  
322 45% of control animals (n=62)). Additionally, *cdh-3>CKI-1::GFP* rescued AC invasion  
323 following depletion of *hlh-2* in L2 RNAi-feeding experiments in most animals examined  
324 (Fig. 6B,C; 87% invaded (n=77), as compared to 56% of control animals (n=59)). As  
325 expected, inducing G1/G0 arrest in the AC failed to rescue *fos-1(RNAi)* treated animals  
326 (Fig. 6B,C; 20% invaded (n=35), as compared to 51% of control animals (n=53)).  
327 Strikingly, although AC-specific CKI-1::GFP blocked AC proliferation following *egl-*  
328 *43(RNAi)*, induced arrest failed to rescue invasion (Fig. 6B,C; 10% invaded (n=31), as  
329 compared to 19% of control animals (n=37)), suggesting that *egl-43* has pro-invasive  
330 functions outside of the cell cycle-dependent pathway. In support of a role for *egl-43*  
331 outside of cell cycle control, induced CKI-1::GFP restores the expression of a reporter of  
332 MMP activity (*zmp-1>mCherry*) in *nhr-67*-depleted animals, but neither *fos-1* nor *egl-43-*  
333 depleted animals show restoration of *zmp-1* transcription (Fig. 6D). Together, these  
334 results reveal the presence of two integrated sub-circuits necessary for invasive activity,  
335 with *egl-43* likely functioning in a critical role for both circuits.

336  
337 ***EGL-43 isoforms function redundantly and in an autoregulative manner during***  
338 ***AC invasion***

339  
340 Two functional isoforms of *egl-43* are encoded in the *C. elegans* genome (Fig. 7A).  
341 Previous research has suggested that the longer isoform functions downstream of *fos-*

342 *1a* to modulate MMP expression and other *fos-1* transcriptional targets, including *cdh-3*  
343 and *him-4*/hemicentin (Hwang et al., 2007; Rimann and Hajnal, 2007). The shorter  
344 isoform has been predicted to either function in Notch/Delta-mediated AC specification  
345 (Hwang et al., 2007) and later Notch/Delta-mediated patterning of the ventral uterus  
346 (Hwang et al., 2007) or as a potential competitive inhibitor for long isoform binding of  
347 downstream targets (Rimann and Hajnal, 2007). Additionally, *fos-1a* and *egl-43* have  
348 been shown to function in an incoherent feed-forward loop with negative feedback, with  
349 *fos-1a* positively regulating and *egl-43* negatively regulating the levels of *mig-*  
350 *10*/lamellipodin, a key adhesion protein important for stabilizing the attachment of the  
351 AC to the BM (Wang et al., 2014). Titrating levels of MIG-10 is critical, as  
352 overexpression of MIG-10 results in AC invasion defects (Wang et al., 2014). Although it  
353 is readily apparent that levels of EGL-43 are critical, it is unclear from previous studies  
354 whether the two isoforms have divergent functions during invasion. Thus, we next  
355 decided to explore *egl-43* isoform function by using newly available tools, including  
356 CRISP/Cas9-genome engineering and improved RNAi.

357  
358 As the start codon methionine of the short isoform of *egl-43* is in-frame with and  
359 contained within the long isoform, there was no simple way to solely tag or interfere with  
360 the short isoform (Fig. 7A). However, we were able to generate a knock-in allele of GFP  
361 at the N-terminus of *egl-43* to tag the long isoform specifically (*GFP::egl-43L*). This  
362 allowed us to compare expression patterns of the long isoform to the internally GFP-  
363 tagged allele that should dually label both isoforms (Fig. 7A,B). We examined animals  
364 during uterine-vulval development and found overlapping expression patterns between  
365 both isoforms with strong AC/VU/DU expression in the somatic gonad (Fig. 7B). Next,  
366 we generated an *egl-43L*-specific improved RNAi targeting vector in T444T and  
367 examined *egl-43L* depletion in the uterine-specific RNAi sensitive genetic background  
368 (Hagedorn et al., 2009; Matus et al., 2010). Depletion of *egl-43L* resulted in a penetrant  
369 AC invasion defect, as expected, but notably, we detected the presence of animals with  
370 both a single non-invasive AC (19%) and animals with multiple ACs (39%) (Fig. 7C,D),  
371 similar to depletion of both isoforms (Fig. 2). We then assessed if the long isoform has  
372 the same quantitative relationship to the other TFs as observed when targeting both



373 isoforms. Indeed, *egl-43(RNAi)* and *egl-43L(RNAi)* exhibited comparable levels of  
374 depletion of *egl-43::GFP::egl-43* (75%, 78%), *GFP::hlh-2* (66%, 60%), and *nhr-67::GFP*  
375 (66%, 64%, respectively) ( $n \geq 25$  animals examined per treatment) (Fig. 3E).

376

377 The insertion of GFP with a ~6 kb self-excising cassette (SEC) generates a  
378 transcriptional reporter that often interferes with the native transcriptional machinery at  
379 the locus where it is inserted. To generate an in-frame fusion protein with GFP, we  
380 excise the SEC by CRE-lox recombination via heat shock (Dickinson and Goldstein,  
381 2016). To determine if newly generated alleles exhibit loss-of-function phenotypes and  
382 to examine transcriptional output, we next examined the pre-floxed versions of both  
383 edited knock-in alleles, in the presence of an mT1 balancer, as homozygous animals  
384 are non-fertile. Unfortunately, the allele resulting from the SEC insertion of the internal  
385 GFP-tag had an extremely low frequency of escapers, and we were unable to obtain L3-  
386 stage animals to examine for AC invasion defects. However, similar to our results with  
387 RNAi (Fig. 7C-E), an allele resulting from SEC insertion with the long isoform (*egl-*  
388 *43(bmd135)*) (Fig. 7F) displayed a 31% AC invasion defect ( $n=11/36$ ), with animals  
389 containing either single or multiple non-invading ACs (Fig. 7G). Finally, as previous  
390 reports based on *promoter>GFP* transgenic animals have suggested that *egl-43* may be  
391 autoregulatory (Matus et al., 2010; Rimann and Hajnal, 2007; Wang et al., 2014), we  
392 examined the mT1-balanced pre-floxed allele of the internally-tagged *egl-43* targeting  
393 both isoforms (*egl-43::GFP^SEC^::egl-43*). We found strong evidence of autoregulation  
394 as *egl-43(RNAi)* reduced the expression of GFP by 65% ( $n \geq 25$  animals) (Fig. 7H,I).  
395 Taken together, these results suggest that both isoforms of *egl-43* function redundantly  
396 to regulate multiple transcriptional sub-circuits critical for the establishment of the  
397 invasive phenotype (Fig. 8).

398

## 399 **DISCUSSION**

400

401 Cellular invasion requires the coordination of extrinsic cues from the surrounding  
402 microenvironment and orchestration of intrinsic regulatory circuits (Rowe and Weiss,  
403 2008; Sherwood and Plastino, 2018). We focus here on exploring the intrinsic pathways

404 that autonomously regulate *C. elegans* AC invasion. This study was tractable due to  
405 several recent technological breakthroughs, allowing for examination of endogenous  
406 regulatory relationships quantitatively. First, we created GFP knock-in alleles of the four  
407 transcription factors (*fos-1a*, *egl-43*, *hlh-2* and *nhr-67*) previously implicated in  
408 autonomously regulating AC invasion (Hwang et al., 2007; Matus et al., 2015; Rimann  
409 and Hajnal, 2007; Schindler and Sherwood, 2011; Sherwood et al., 2005). Additionally,  
410 we generated new improved RNAi depletion constructs to strongly reduce TF activity.  
411 Combining these technologies enabled us to correlate phenotype to protein depletion  
412 and compare regulatory relationships in a quantitative framework. Our experiments  
413 reveal new roles for *egl-43* and *hlh-2* in regulating *nhr-67*-mediated cell cycle arrest and  
414 suggest that these TFs function in a coherent feed-forward loop with positive feedback.  
415 Additionally, we demonstrate that *egl-43* is autoregulatory and functions in both cell  
416 cycle-dependent and independent sub-circuits to orchestrate invasion (Fig. 8).  
417 Together, these results provide the first description of the regulatory relationships  
418 between the endogenous TFs that promote invasive differentiation during *C. elegans*  
419 uterine-vulval attachment.

420  
421 *nhr-67* functions to maintain the post-mitotic state of the AC (Matus et al., 2015). Here,  
422 we demonstrate that *egl-43* and *hlh-2* both regulate *nhr-67*, and that *nhr-67*-depletion  
423 also reduces HLH-2 levels. Network inference suggests these three TFs function in a  
424 classic type I coherent feed-forward loop regulatory circuit with positive feedback  
425 (Mangan and Alon, 2003) (Fig. 8). Our model fits with data by others showing that *hlh-2*  
426 may directly bind to the *nhr-67* promoter through two canonical E-box motifs found in a  
427 164 bp window in a functional promoter element deleted in several hypomorphic alleles  
428 of *nhr-67* (Bodofsky et al., 2018; Matus et al., 2015; Verghese et al., 2011). Further,  
429 deletion of these *hlh-2* conserved binding sites results in loss of AC-specific GFP  
430 expression in transgenic lines (Bodofsky et al., 2018). While others have also reported  
431 positive regulation by EGL-43 on *nhr-67* activity via transgenic reporters (Bodofsky et  
432 al., 2018), this interaction may be indirect, as no known binding sites exist for EGL-43 in  
433 the *nhr-67* promoter. Alternatively, EGL-43 and NHR-67 have been predicted, based on

434 yeast two-hybrid experiments, to interact at the protein-protein level (Reece-Hoyes et  
435 al., 2013).

436

437 We have also examined the activity of the two previously identified isoforms of *egl-43*  
438 (Hwang et al., 2007; Rimann and Hajnal, 2007), by generating multiple GFP knock-in  
439 alleles paired with more penetrant RNAi depletions. Previous work has suggested that  
440 the long isoform functions specifically downstream of *fos-1a* to regulate MMP activity  
441 and other pro-invasive gene expression (Rimann and Hajnal, 2007). As both mutant  
442 analyses and RNAi depletion of the long isoform phenocopy depletion of both isoforms,  
443 our data suggest that either the long isoform of *egl-43* functions redundantly with the  
444 short isoform or that it functions as the dominant isoform at the intersection of multiple  
445 regulatory circuits.

446

447 Together, our data and corroborating evidence from the literature support the existence  
448 of a coherent feed-forward circuit with positive feedback among *egl-43*, *hlh-2* and *nhr-*  
449 *67*, in maintaining the post-mitotic state of the AC (Fig. 8). We have previously shown  
450 that *nhr-67* positively regulates transcripts of *cki-1* specifically in the AC (Matus et al.,  
451 2015). Thus, to test our putative regulatory circuit, we induced expression of *cki-1* in the  
452 AC, which prevents an AC from inappropriately entering the cell cycle. This forced  
453 G1/G0 arrest fully rescues *nhr-67* depletion (Matus et al., 2015). Strikingly, induced *cki-*  
454 *1* strongly rescues *hlh-2* depletion as well. Thus, *hlh-2* appears to function primarily in  
455 controlling NHR-67 activity in maintenance of the post-mitotic state of the AC. These  
456 results are in stark contrast to *cki-1* induction paired with strong *egl-43* depletion, where  
457 most cell cycle arrested ACs still fail to invade, and fail to express an MMP, *zmp-1*.  
458 These results suggest that *egl-43* functions in multiple regulatory circuits. This is  
459 supported by recent work demonstrating a type I incoherent feed-forward loop between  
460 *fos-1a*, *egl-43L* and the BM adhesion protein MIG-10/lamellipodin (Wang et al., 2014).  
461 Finally, our observation that *egl-43* is autoregulatory, also shown previously by  
462 *promoter>GFP* fusions (Matus et al., 2015; Rimann and Hajnal, 2007; Wang et al.,  
463 2014) supports a model where *egl-43* occupies a key node at the intersection of multiple  
464 pro-invasive circuits (Fig. 8). As all three TFs that function in the cell cycle-dependent

465 circuit are also involved in the Notch/Delta-mediated specification of the AC/VU fates  
466 (Hwang et al., 2007; Karp and Greenwald, 2004) it will be interesting to explore whether  
467 these regulatory relationships are maintained in the AC/VU specification network.  
468  
469 Feed-forward regulatory loops are likely the most well described network motif occurring  
470 in all GRNs (Cordero and Hogeweg, 2006; Davidson, 2010; Mangan and Alon, 2003).  
471 From *E. coli* (Milo et al., 2002; Shen-Orr et al., 2002) and yeast (Lee et al., 2002; Milo et  
472 al., 2002) to a myriad of examples across the Metazoa (reviewed in Davidson, 2010),  
473 feed-forward loops are thought to function as filters for transient inputs (reviewed in  
474 Alon, 2007; Hinman, 2016). The addition of positive feedback, generating a coherent  
475 feed-forward loop, provides stability to the sub-circuit and is often found in differentiation  
476 gene batteries coincident with autoregulation (Davidson, 2010). These network motifs  
477 have been described in many developmental contexts, from MyoD-driven vertebrate  
478 skeletal muscle differentiation (Penn et al., 2004), the patterning of the *Drosophila* egg  
479 shell via the TF Broad and interactions with EGFR and Dpp signaling (Yakoby et al.,  
480 2007), Pax6-dependent regulation of c-Maf and crystallin expression in the mouse  
481 embryonic lens (Xie and Cvekl, 2011) and terminal selector neuronal differentiation in *C.*  
482 *elegans* and mammals (reviewed in Hobert, 2008). During *C. elegans* embryonic  
483 development, a series of coherent feed-forward loops utilizing SKN-1/MED-1,2 and then  
484 a suite of reiteratively used GATA factors (END-1,-3) are required to successfully  
485 pattern endomesoderm development (reviewed in Maduro, 2009). Thus, our  
486 identification of a coherent feed-forward loop in the *C. elegans* AC maintaining the post-  
487 mitotic state, likely evolved to coordinate AC cell cycle exit, both as a by-product of  
488 terminal differentiation and a morphogenetic requirement for invasive behavior (Matus  
489 et al., 2015). AC invasion is necessary for egg-laying, and defects in the process results  
490 in penetrant Protruding vulva/Egg-laying defective (Pvl/Egl) phenotypes, reducing  
491 fecundity in individual animals by nearly ten-fold. Thus, redundant control of the sub-  
492 circuit regulating differentiation and cell cycle arrest may have been under strong  
493 selection, providing an explanation for the regulatory relationships between *egl-43*, *hlh-2*  
494 and *nhr-67* we characterize here.  
495

496 We are just beginning to understand connections between regulatory circuits and  
497 morphogenetic behaviors (Martik and McClay, 2015; Saunders and McClay, 2014)  
498 (Christiaen et al., 2008). It is our hope that the ease of genome editing and protein  
499 perturbation strategies will facilitate the kind of analyses we have performed here in  
500 other metazoan systems. In summary, in this study we characterize the complex  
501 relationships between the four pro-invasive TFs that function during AC differentiation to  
502 program invasive behavior. We identify a classic type I FFL regulating mitotic exit and  
503 controlling a switch between proliferative and invasive behavior. Whether or not similar  
504 circuit architecture is utilized to regulate invasive and proliferative cell biology in other  
505 developmental invasive contexts, including mammalian trophoblast implantation and  
506 placentation (Carter et al., 2015; Red-Horse et al., 2004) and EMT events during  
507 gastrulation (Vega et al., 2004) is still poorly understood. Finally, as there appear to be  
508 many cancer sub-types that may switch between proliferative and invasive fates  
509 (reviewed in Kohrman and Matus, 2017), improving our understanding of the  
510 transcriptional network architecture of invasive cells may provide new therapeutic nodes  
511 to target in reducing the lethality associated with cancer metastasis.

512

## 513 **MATERIALS AND METHODS**

514

### 515 ***C. elegans strains and culture conditions***

516

517 Animals were reared under standard conditions and cultured at 25°C, with the exception  
518 of temperature-sensitive strains containing the *rrf-3(pk1426)* allele, conferring RNAi  
519 hypersensitivity, which were maintained at 15°C and 20°C (Brenner, 1974; Simmer et  
520 al., 2002). Animals were synchronized for experiments through alkaline hypochlorite  
521 treatment of gravid adults to isolate eggs (Porta-de-la-Riva et al., 2012). In the text and  
522 figures, we designate linkage to a promoter through the use of the (>) symbol and fusion  
523 of a proteins via a (::) annotation. The following transgenes and alleles were used in this  
524 study: *qyls102[fos-1>RDE-1;myo-2>YFP]* **LG I** *hlh-2(bmd90[hlh-2>LoxP::GFP::HLH-2])*,  
525 *qyls227 [cdh-3>mCherry::moeABD]*; **LG II** *egl-43(bmd87[egl-43>SEC::GFP::EGL-43])*,  
526 *egl-43(bmd88[egl-43>LoxP::GFP::EGL-43])*, *egl-43(bmd136[egl-43L>LoxP::GFP::EGL-*

527 43]) *rrf-3(pk1426)*; *qyls17 [zmp-1>mCherry]* **LG III** *unc-119(ed4)*, **LG IV** *nhr-*  
528 *67(syb509[nhr-67>NHR-67::GFP])*, *qyls10[lam-1>LAM-1::GFP]* **LG V** *fos-1(bmd138[fos-*  
529 *1>LoxP::GFP::FOS-1])*, *qyls225[cdh-3>mCherry::moeABD]*, *rde-1(ne219)*, *qyls24[cdh-*  
530 *3<sup>1.5</sup>>mCherry::PLC $\delta$ PH]*, *qyls266[cdh-3>CKI-1::GFP]* **LG X** *qyls7[lam-1>LAM-1::GFP]*.  
531 See Table S2 for additional details of strains used and generated in this study.

532

### 533 ***Molecular biology and microinjection***

534

535 Transcription factors were tagged at their endogenous loci using CRISPR/Cas9 genome  
536 editing via microinjection into the hermaphrodite gonad (Dickinson and Goldstein, 2016;  
537 Dickinson et al., 2013). Repair templates were generated as synthetic DNAs from either  
538 Integrated DNA Technologies (IDT) as gBlocks or Twist Biosciences and cloned into  
539 *ccdB* compatible sites in pDD282 by New England Biolabs Gibson assembly (Dickinson  
540 et al. 2016). Homology arms ranged from 690 – 1200 bp (see supplementary material  
541 Table S3-5 for additional details). sgRNAs were constructed by EcoRV and NheI  
542 digestion of plasmid pDD122. A 230bp amplicon was generated replacing the sgRNA  
543 targeting sequence from pDD122 with a new sgRNA and NEB Gibson assembly was  
544 used to generate new sgRNA plasmids (see Table S3,4 for more details).  
545 Hermaphrodite adults were co-injected with guide plasmid (50 ng/ $\mu$ L), repair plasmid  
546 (50 ng/ $\mu$ L), and an extrachromosomal array marker (pCFJ90, 2.5 ng/ $\mu$ L), and incubated  
547 at 25 °C for several days before carrying out screening and floxing methods associated  
548 with the SEC (Dickinson et al., 2015).

549

### 550 ***RNA interference***

551

552 An RNAi library of the pro-invasive TFs was constructed by cloning 950-1000 bp of  
553 synthetic DNA (663 bp for the *egl-43* long-specific isoform) based on cDNA sequences  
554 available on WormBase ([www.wormbase.org](http://www.wormbase.org)) into the highly efficient T444T RNAi  
555 vector (Grove et al., 2018; Sturm et al., 2018). Synthetic DNAs were generated by IDT  
556 as gBlocks or Twist Biosciences as DNA fragments and cloned into restriction digested  
557 T444T using NEB Gibson Assembly (see Tables S3, S6 for additional details). For most



558 experiments, synchronized L1 stage animals were directly exposed to RNAi through  
559 feeding with bacteria expressing dsRNA (Conte Jr. et al., 2015). Due to the fact that  
560 early *hlh-2* RNAi treatment perturbs AC specification, animals were initially placed on  
561 empty vector RNAi plates and then transferred to *hlh-2* RNAi plates post-specification,  
562 approximately 12 hours later at 25°C or 24 hours later at 15°C (Schindler and  
563 Sherwood, 2011).

564

### 565 ***Live cell imaging***

566

567 All micrographs included in this manuscript were collected on a Hamamatsu Orca EM-  
568 CCD camera mounted on an upright Zeiss AxioImager A2 with a Borealis-modified  
569 CSU10 Yokagawa spinning disk scan head using 488 nm and 561 nm Vortran lasers in  
570 a VersaLase merge and a Plan-Apochromat 100x/1.4 (NA) Oil DIC objective.

571 MetaMorph software (Molecular Devices) was used for microscopy automation. Several  
572 experiments were imaged using epifluorescence collected on a Zeiss AxioCam MRM  
573 camera, also mounted on an upright Zeiss AxioImager A2 and a Plan-Apochromat  
574 100x/1.4 (NA) Oil DIC objective. Animals were mounted into a drop of M9 on a 5%  
575 Noble agar pad containing approximately 10 mM sodium azide as paralytic and topped  
576 with a coverslip.

577

### 578 ***Scoring of AC invasion***

579

580 AC invasion was scored at the P6.p 4-cell stage, when 100% of wild-type animals  
581 exhibit a breached BM (Sherwood and Sternberg, 2003). Presence of green  
582 fluorescence under the AC, in strains with the laminin::GFP transgene, or presence of a  
583 phase dense line, in strains without the transgene, was used to assess invasion. Wild-  
584 type invasion is defined as a breach as wide as the basolateral surface of the AC,  
585 whereas partial invasion indicates the presence of a breach smaller than the footprint of  
586 the AC (Sherwood and Sternberg, 2003).

587

### 588 ***Image quantification and statistical analyses***

589

590 Images were processed using FIJI/ImageJ (v. 2.0.0-rc-69, NIH Image) (Schindelin et al.,  
591 2012). With the exception of the developmental series displayed in Fig. 3 & Fig. S1D, all  
592 other micrographs were taken at the P6.p 4-cell stage, when 100% of wild-type animals  
593 exhibit a breached BM. Expression levels of TFs were quantified by measuring the  
594 mean gray value of AC nuclei of, defined as somatic gonad cells strongly expressing the  
595 *cdh-3>mCherry::moeABD* transgene, subtracted by the mean gray value of a  
596 background region of equal area, to account for EM-CCD camera noise. *zmp-*  
597 *1>mCherry* levels were quantified in control and *cdh-3>CKI-1::GFP* animals by  
598 measuring the mean gray value of the entire AC, selected either by a hand drawn  
599 region of interest or using the threshold and wand tool in FIJI/ImageJ (v. 1.52n). For  
600 molecular epistasis experiments (Fig. 5, Fig. 7E,I & Fig. S3) and characterization of  
601 CDT-1 localization (Fig. 6), only TF RNAi treated animals that did not exhibit defects in  
602 invasion were excluded from analysis. Data was normalized to negative control (empty  
603 vector) values for the plots in Fig. 4E, 6D, & 7E, and to both negative control and  
604 positive control values for determining the interaction strengths represented in Fig. 8.  
605 Images were overlaid and figures were assembled using Adobe Photoshop and  
606 Illustrator CS, respectively. Statistical analyses and plotting of data were conducted  
607 using RStudio (v. 1.1.463). Individual data points for each experiment were collected  
608 over multiple days. Statistical significance was determined using either a two-tailed  
609 Student's t-test or Fisher's exact probability test. Figure legends specify when each test  
610 was used and the p-value cut-off set.

611

## 612 **ACKNOWLEDGMENTS**

613 We are grateful to R. Adikes, B. Kinney, A. Kohrman, M. Martinez and B. Martin for  
614 comments on the manuscript.

615

## 616 **COMPETING INTERESTS**

617 No competing interests declared.

618

## 619 **AUTHOR CONTRIBUTIONS**



620 D.Q.M., T.N.M. and J.J.S. designed the experiments. All authors performed the  
621 experiments. T.N.M. and D.Q.M. performed the data analyses and wrote the paper with  
622 feedback from the other authors.

623

624 **FUNDING**

625 This work was funded by the National Institute of Health (NIH) National Cancer Institute  
626 [5R00CA154870-05 to D.Q.M.] and National Institute of General Medical Sciences  
627 (NIGMS) [1R01GM121597-01 to D.Q.M.]. D.Q.M. is also a Damon Runyon-Rachleff  
628 Innovator supported (in part) by the Damon Runyon Cancer Research Foundation  
629 [DRR-47-17]. J.J.S. is supported by NIGMS [3R01GM121597-02S1] and N.J.P. is  
630 supported by the American Cancer Society [132969-PF-18-226-01-CSM]. Some strains  
631 were provided by the *Caenorhabditis* Genetics Center, which is funded by the NIH  
632 Office of Research Infrastructure Programs [P40 OD010440].

## REFERENCES

- Alon, U.** (2007). Network motifs: theory and experimental approaches. *Nat. Rev. Genet.* **8**, 450–61.
- Bodofsky, S., Liberatore, K., Pioppo, L., Lapadula, D., Thompson, L., Birnbaum, S., McClung, G., Kartik, A., Clever, S. and Wightman, B.** (2018). A tissue-specific enhancer of the *C. elegans* *nhr-67/tailless* gene drives coordinated expression in uterine stem cells and the differentiated anchor cell. *Gene Expr. Patterns* **30**, 71–81.
- Brenner, S.** (1974). The genetics of *Caenorhabditis elegans*. *Genetics* **77**, 71–94.
- Carter, A. M., Enders, A. C. and Pijnenborg, R.** (2015). The role of invasive trophoblast in implantation and placentation of primates. *Philos. Trans. R. Soc. B Biol. Sci.* **370**, 20140070–20140070.
- Christiaen, L., Davidson, B., Kawashima, T., Powell, W., Nolla, H., Vranizan, K. and Levine, M.** (2008). The transcription/migration interface in heart precursors of *Ciona intestinalis*. *Science (80- )*. **320**, 1349–1352.
- Conte Jr., D., T. Macneil, L., J. M. Walhout, A. and C. Mello, C.** (2015). *RNA Interference in Caenorhabditis Elegans*.
- Cordero, O. X. and Hogeweg, P.** (2006). Feed-forward loop circuits as a side effect of genome evolution. *Mol. Biol. Evol.* **23**, 1931–1936.
- Davidson, E. H.** (2010). Emerging properties of animal gene regulatory networks. *Nature* **468**, 911–920.
- Dickinson, D. J. and Goldstein, B.** (2016). CRISPR-based methods for *caenorhabditis elegans* genome engineering. *Genetics* **202**, 885–901.
- Dickinson, D. J., Ward, J. D., Reiner, D. J. and Goldstein, B.** (2013). Engineering the *Caenorhabditis elegans* genome using Cas9-triggered homologous recombination. *Nat. Methods* **10**, 1028–1034.
- Dickinson, D. J., Pani, A. M., Heppert, J. K., Higgins, C. D. and Goldstein, B.** (2015). Streamlined genome engineering with a self-excising drug selection cassette. *Genetics* **200**, 1035–1049.
- Grove, C., Cain, S., Chen, W. J., Davis, P., Harris, T., Howe, K., Kishore, R., Lee, R.,**

- Paulini, M., Raciti, D., et al.** (2018). Using WormBase, a genome biology resource for *Caenorhabditis elegans* and related nematodes. *Methods Mol. Biol.* **1757**, 399–470.
- Gupta, B. P., Hanna-Rose, W. and Sternberg, P. W.** (2012). Morphogenesis of the vulva and the vulval-uterine connection. *WormBook*.
- Haerty, W., Artieri, C., Khezri, N., Singh, R. S. and Gupta, B. P.** (2008). Comparative analysis of function and interaction of transcription factors in nematodes: Extensive conservation of orthology coupled to rapid sequence evolution. *BMC Genomics* **9**, 1–16.
- Hagedorn, E. J., Yashiro, H., Ziel, J. W., Ihara, S., Wang, Z. and Sherwood, D. R.** (2009). Integrin Acts Upstream of Netrin Signaling to Regulate Formation of the Anchor Cell's Invasive Membrane in *C. elegans*. *Dev. Cell* **17**, 187–198.
- Hagedorn, E. J., Ziel, J. W., Morrissey, M. A., Linden, L. M., Wang, Z., Chi, Q., Johnson, S. A. and Sherwood, D. R.** (2013). The netrin receptor DCC focuses invadopodia-driven basement membrane transmigration in vivo. *J. Cell Biol.* **201**, 903–913.
- Hanahan, D. and Weinberg, R. A.** (2011). Hallmarks of cancer: The next generation. *Cell* **144**, 646–674.
- Hinman, V. F.** (2016). Gene Networks Driving Development, Conservation and Evolution of. *Encycl. Evol. Biol.* 110–116.
- Hobert, O.** (2008). Regulatory logic of neuronal diversity: Terminal selector genes and selector motifs. *Proc. Natl. Acad. Sci.* **105**, 20067–20071.
- Hwang, B. J., Meruelo, A. D. and Sternberg, P. W.** (2007). *C. elegans* EVI1 proto-oncogene, EGL-43, is necessary for Notch-mediated cell fate specification and regulates cell invasion. *Development* **134**, 669–679.
- Karp, X. and Greenwald, I.** (2004). Multiple roles for the E/Daughterless ortholog HLH-2 during *C. elegans* gonadogenesis. *Dev. Biol.* **272**, 460–469.
- Kelley, L. C., Lohmer, L. L., Hagedorn, E. J. and Sherwood, D. R.** (2014). Traversing the basement membrane in vivo: A diversity of strategies. *J. Cell Biol.* **204**, 291–302.
- Kelley, L. C., Hastie, E. L., Cáceres, R., Chi, Q., Schindler, A. J., Jiang, Y., Matus,**

- D. Q., Plastino, J. and Sher (2018).** Adaptive F-actin polymerization and localized ATP production drive basement membrane invasion in the absence of MMPs. *Dev. Cell* 1–16.
- Kohrman, A. Q. and Matus, D. Q. (2017).** Divide or Conquer: Cell Cycle Regulation of Invasive Behavior. *Trends Cell Biol.* **27**, 12–25.
- Lee, T., Hannett, N., Harbison, C., Thompson, C., Simon, I., Zeitlinger, J., Jennings, E., Murray, H., Gordon, D., Ren, B., et al. (2002).** Transcriptional Regulatory Networks in *Saccharomyces cerevisiae*. *Science (80- )*. **298**, 799–804.
- Maduro, M. F. (2009).** Structure and evolution of the *C. elegans* embryonic endomesoderm network. *Biochim. Biophys. Acta - Gene Regul. Mech.* **1789**, 250–260.
- Mangan, S. and Alon, U. (2003).** Structure and function of the feed-forward loop network motif. *Proc. Natl. Acad. Sci.* **100**,.
- Martik, M. L. and McClay, D. R. (2015).** Deployment of a retinal determination gene network drives directed cell migration in the sea urchin embryo. *Elife* **4**, 1–19.
- Matus, D. Q., Li, X.-Y., Durbin, S., Agarwal, D., Chi, Q., Weiss, S. J. and Sherwood, D. R. (2010).** In vivo identification of regulators of cell invasion across basement membranes. *Sci. Signal.* **3**, ra35.
- Matus, D. Q., Chang, E., Makohon-Moore, S. C., Hagedorn, M. A., Chi, Q. and Sherwood, D. R. (2014).** Cell division and targeted cell cycle arrest opens and stabilizes basement membrane gaps. *Nat. Commun.* **5**,.
- Matus, D. Q., Lohmer, L. L., Kelley, L. C., Schindler, A. J., Kohrman, A. Q., Barkoulas, M., Zhang, W., Chi, Q. and Sherwood, D. R. (2015).** Invasive Cell Fate Requires G1 Cell-Cycle Arrest and Histone Deacetylase-Mediated Changes in Gene Expression. *Dev. Cell* **35**, 162–174.
- Medwig, T. N. and Matus, D. Q. (2017).** Breaking down barriers: the evolution of cell invasion. *Curr. Opin. Genet. Dev.* **47**, 33–40.
- Milo, R., Shen-Orr, S., Itzkovitz, S., Kashtan, N., Chklovskii, D. and Alon, U. (2002).** Network motifs: simple building blocks of complex networks. *Science (80- )*. **298**, 824–827.
- Morrissey, M. A., Keeley, D. P., Hagedorn, E. J., McClatchey, S. T. H., Chi, Q., Hall,**

- D. H. and Sherwood, D. R.** (2014). B-LINK: A Hemicentin, Plakin, and Integrin-Dependent Adhesion System that Links Tissues by Connecting Adjacent Basement Membranes. *Dev. Cell* **31**, 319–331.
- Penn, B. H., Bergstrom, D. A., Dilworth, F. J., Bengal, E. and Tapscott, S. J.** (2004). A MyoD -generated feed-forward circuit temporally patterns gene expression during skeletal muscle differentiation. *Genes Dev.* **18**, 2348–2353.
- Porta-de-la-Riva, M., Fontrodona, L., Villanueva, A. and Cerón, J.** (2012). Basic Caenorhabditis elegans Methods: Synchronization and Observation. *J. Vis. Exp.* 1–9.
- Red-Horse, K., Zhou, Y., Genbacev, O., Prakobphol, A., Foulk, R., McMaster, M. and Fisher, S. J.** (2004). Trophoblast differentiation during embryo implantation and formation of the maternal-fetal interface. *J. Clin. Invest.* **114**, 744–754.
- Reece-Hoyes, J. S., Pons, C., Diallo, A., Mori, A., Shrestha, S., Kadreppa, S., Nelson, J., DiPrima, S., Dricot, A., Lajoie, B. R., et al.** (2013). Extensive rewiring and complex evolutionary dynamics in a C.elegans multiparameter transcription factor network. *Mol. Cell* **51**, 116–127.
- Rimann, I. and Hajnal, A.** (2007). Regulation of anchor cell invasion and uterine cell fates by the egl-43 Evi-1 proto-oncogene in Caenorhabditis elegans. *Dev. Biol.* **308**, 187–195.
- Rowe, R. G. and Weiss, S. J.** (2008). Breaching the basement membrane: who, when and how? *Trends Cell Biol.* **18**, 560–574.
- Sallee, M. D., Littleford, H. E. and Greenwald, I.** (2017). A bHLH Code for Sexually Dimorphic Form and Function of the C. elegans Somatic Gonad. *Curr. Biol.* **27**, 1853-1860.e5.
- Saunders, L. R. and McClay, D. R.** (2014). Sub-circuits of a gene regulatory network control a developmental epithelial-mesenchymal transition. *Development* **141**, 1503–1513.
- Schindelin, J., Arganda-Carreras, I., Frise, E., Kaynig, V., Longair, M., Pietzsch, T., Preibisch, S., Rueden, C., Saalfeld, S., Schmid, B., et al.** (2012). Fiji: an open-source platform for biological-image analysis. *Nat. Methods* **9**, 676–82.
- Schindler, A. J. and Sherwood, D. R.** (2011). The transcription factor HLH-

- 2/E/Daughterless regulates anchor cell invasion across basement membrane in *C. elegans*. *Dev. Biol.* **357**, 380–391.
- Shen-Orr, S. S., Milo, R., Mangan, S. and Alon, U.** (2002). Network motifs in the transcriptional regulation network of *Escherichia coli*. *Nat. Genet.* **31**, 64–68.
- Sherwood, D. R. and Plastino, J.** (2018). Invading, leading and navigating cells in *Caenorhabditis elegans*: Insights into cell movement in vivo. *Genetics* **208**, 53–78.
- Sherwood, D. R. and Sternberg, P. W.** (2003). Anchor cell invasion into the vulval epithelium in *C. elegans*. *Dev. Cell* **5**, 21–31.
- Sherwood, D. R., Butler, J. A., Kramer, J. M. and Sternberg, P. W.** (2005). FOS-1 promotes basement-membrane removal during anchor-cell invasion in *C. elegans*. *Cell* **121**, 951–962.
- Simmer, F., Tijsterman, M., Parrish, S., Koushika, S. P., Nonet, M. L., Fire, A., Ahringer, J., Plasterk, R. H. A., Louis, S., Road, T. C., et al.** (2002). Loss of the Putative RNA-Directed RNA Polymerase RRF-3 Makes. *Current* **12**, 1317–1319.
- Sturm, Á., Saskoi, É., Tibor, K., Weinhardt, N. and Vellai, T.** (2018). Highly efficient RNAi and Cas9-based auto-cloning systems for *C. elegans* research. *Nucleic Acids Res.* **46**, e105.
- Vega, S., Morales, A. V., Ocaña, O. H., Valdés, F., Fabregat, I. and Nieto, M. A.** (2004). Snail blocks the cell cycle and confers resistance to cell death. *Genes Dev.* **18**, 1131–1143.
- Verghese, E., Schocken, J., Jacob, S., Wimer, A. M., Royce, R., Nesmith, J. E., Baer, G. M., Clever, S., McCain, E., Lakowski, B., et al.** (2011). The tailless ortholog *nhr-67* functions in the development of the *C. elegans* ventral uterus. *Dev. Biol.* **356**, 516–528.
- Wang, L., Shen, W., Lei, S., Matus, D., Sherwood, D. and Wang, Z.** (2014). MIG-10 (Lamellipodin) stabilizes invading cell adhesion to basement membrane and is a negative transcriptional target of EGL-43 in *C. elegans*. *Biochem. Biophys. Res. Commun.* **452**, 328–333.
- Wilkinson, H. A., Fitzgerald, K. and Greenwald, I.** (1994). Reciprocal changes in expression of the receptor *lin-12* and its ligand *lag-2* prior to commitment in a *C. elegans* cell fate decision. *Cell* **79**, 1187–1198.

Medwig-Kinney, et al. (2019)

GRN for invasive differentiation

**Xie, Q. and Cvekl, A.** (2011). The orchestration of mammalian tissue morphogenesis through a series of coherent feed-forward loops. *J. Biol. Chem.* **286**, 43259–43271.

**Yakoby, N., Lembong, J., Schupbach, T. and Shvartsman, S. Y.** (2007). *Drosophila* eggshell is patterned by sequential action of feedforward and feedback loops. *Development* **135**, 343–351.



## FIGURES AND FIGURE LEGENDS

### Figure 1

Medwig-Kinney et al., 2019

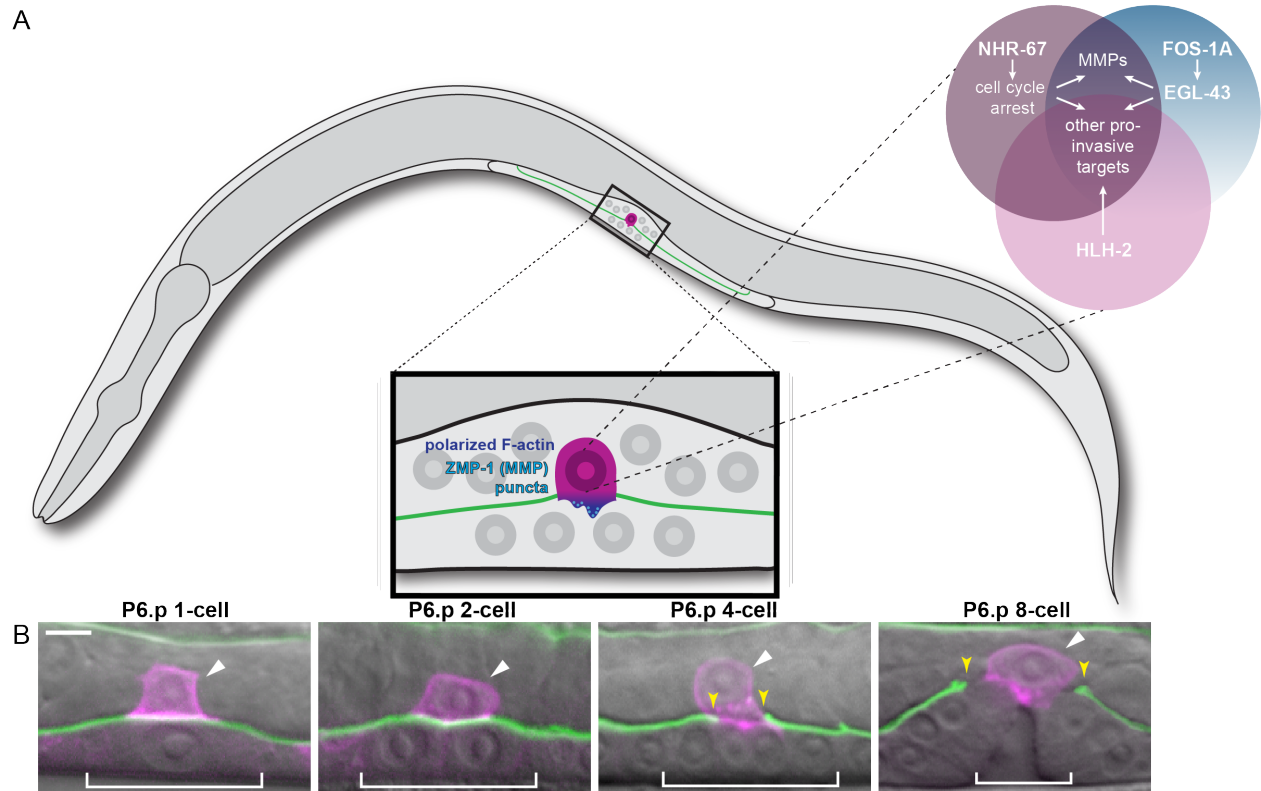

**Fig. 1. Overview of *C. elegans* AC invasion.** (A) Schematic depicting *C. elegans* AC (magenta) invasion through the BM (green), including polarization of the F-actin cytoskeleton (blue) into invasive protrusions and expression of MMPs (cyan) in the post-mitotic AC. Venn diagram (upper right) summarizes current TF relationships. (B) Single confocal planes overlaid on DIC depict the timing of AC (magenta, expressing *cdh-3<sup>1.5</sup>*>mCherry::PLC $\delta^{\text{PH}}$ ) invasion through the BM (green, *lam-1*>LAM-1::GFP). In this and all other figures, white arrowheads denote ACs, yellow arrowheads demarcate boundaries of gaps in the BM, and white brackets delineate P6.p and its descendants. Scale bar 5  $\mu\text{m}$ , in this and all other figures.



**Figure 2**

Medwig-Kinney et al., 2019

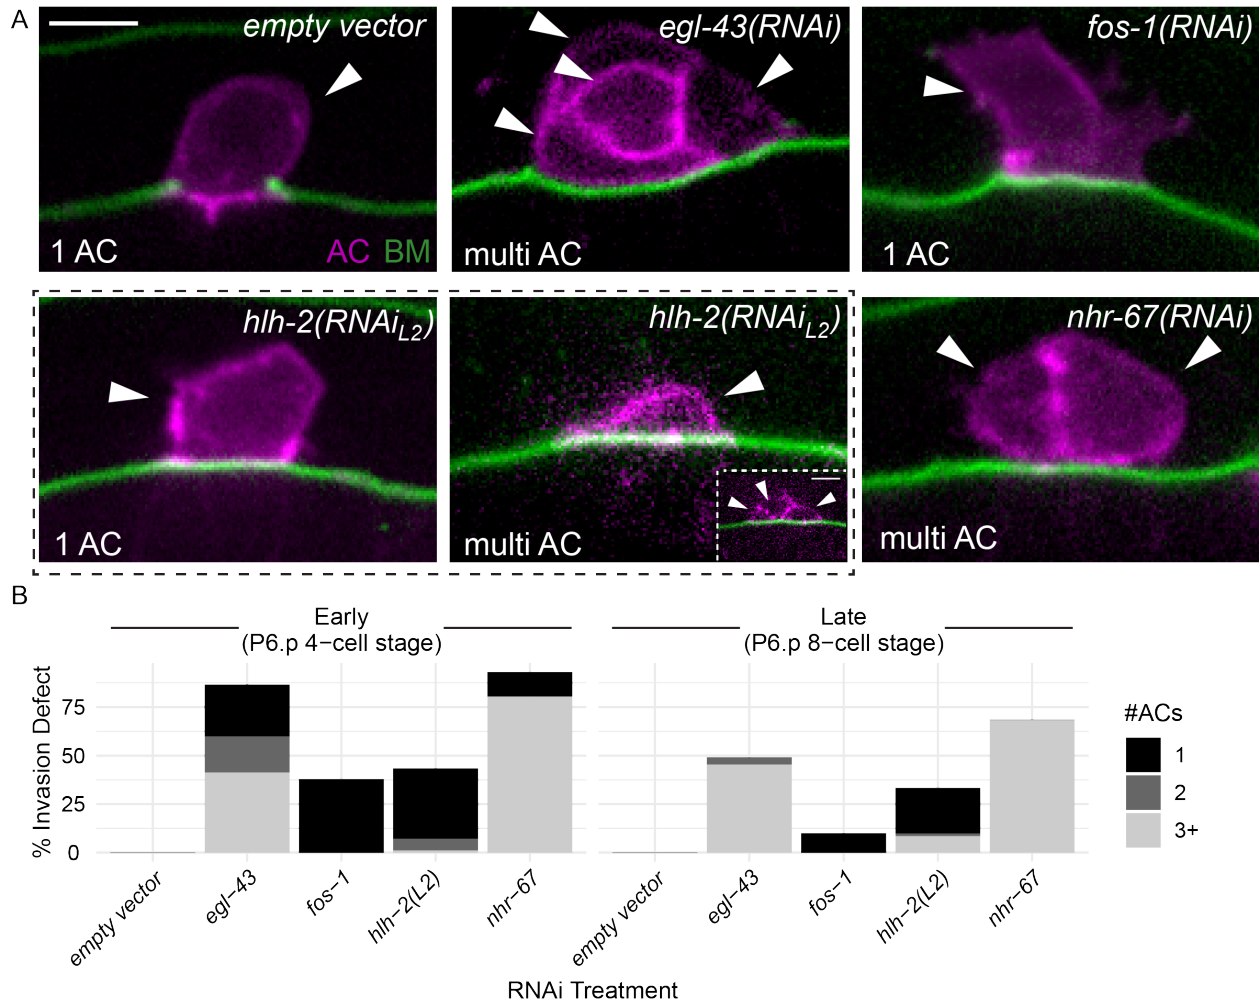

**Fig. 2. RNAi depletion of pro-invasive TFs leads to defects in AC invasion and proliferation.** (A) Single plane of confocal z-stack depicting representative empty vector control (upper left) and TF-RNAi depletion phenotypes. The AC-specific membrane marker (magenta, *cdh-3<sup>1.5</sup>*>mCherry::PLC $\delta^{\text{PH}}$ ) and BM marker (green, *lam-1*>LAM-1::GFP) are overlaid in each micrograph. In this and all other figures, dashed box denotes single vs. multi AC phenotypes that result from HLH-2 depletion, with multiple ACs from additional confocal z-planes shown as insets, accordingly. (B) Stacked bar chart showing penetrance of invasion defects, binned by number of ACs (p-value < 0.00001, Fisher's exact test, empty vector as compared to each TF-RNAi, n  $\geq$  50 animals examined for each treatment).

**Figure 3**

Medwig-Kinney et al., 2019

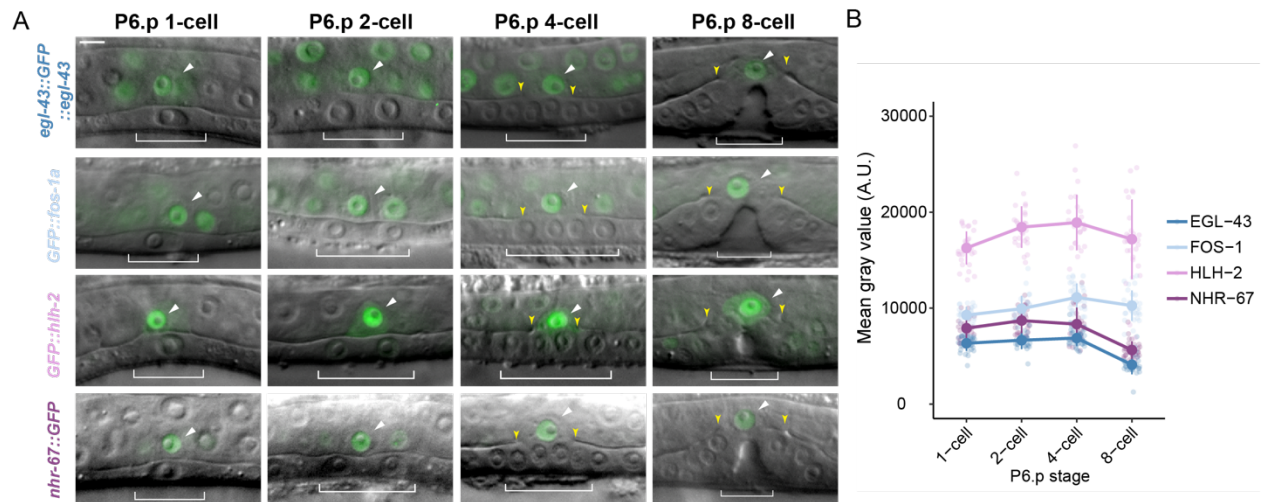

**Fig. 3. Expression of endogenously-tagged pro-invasive TFs in the AC over developmental time.** (A) DIC overlaid with single plane of confocal z-stack for endogenous GFP-tagged TFs. (B) Quantification of TF GFP, in relation to the division of P6.p. In this and all other figures, circle denotes mean gray value of population ( $n \geq 25$  for each stage), in this and all other figures bar denotes S.D.

**Figure 4**

Medwig-Kinney et al., 2019

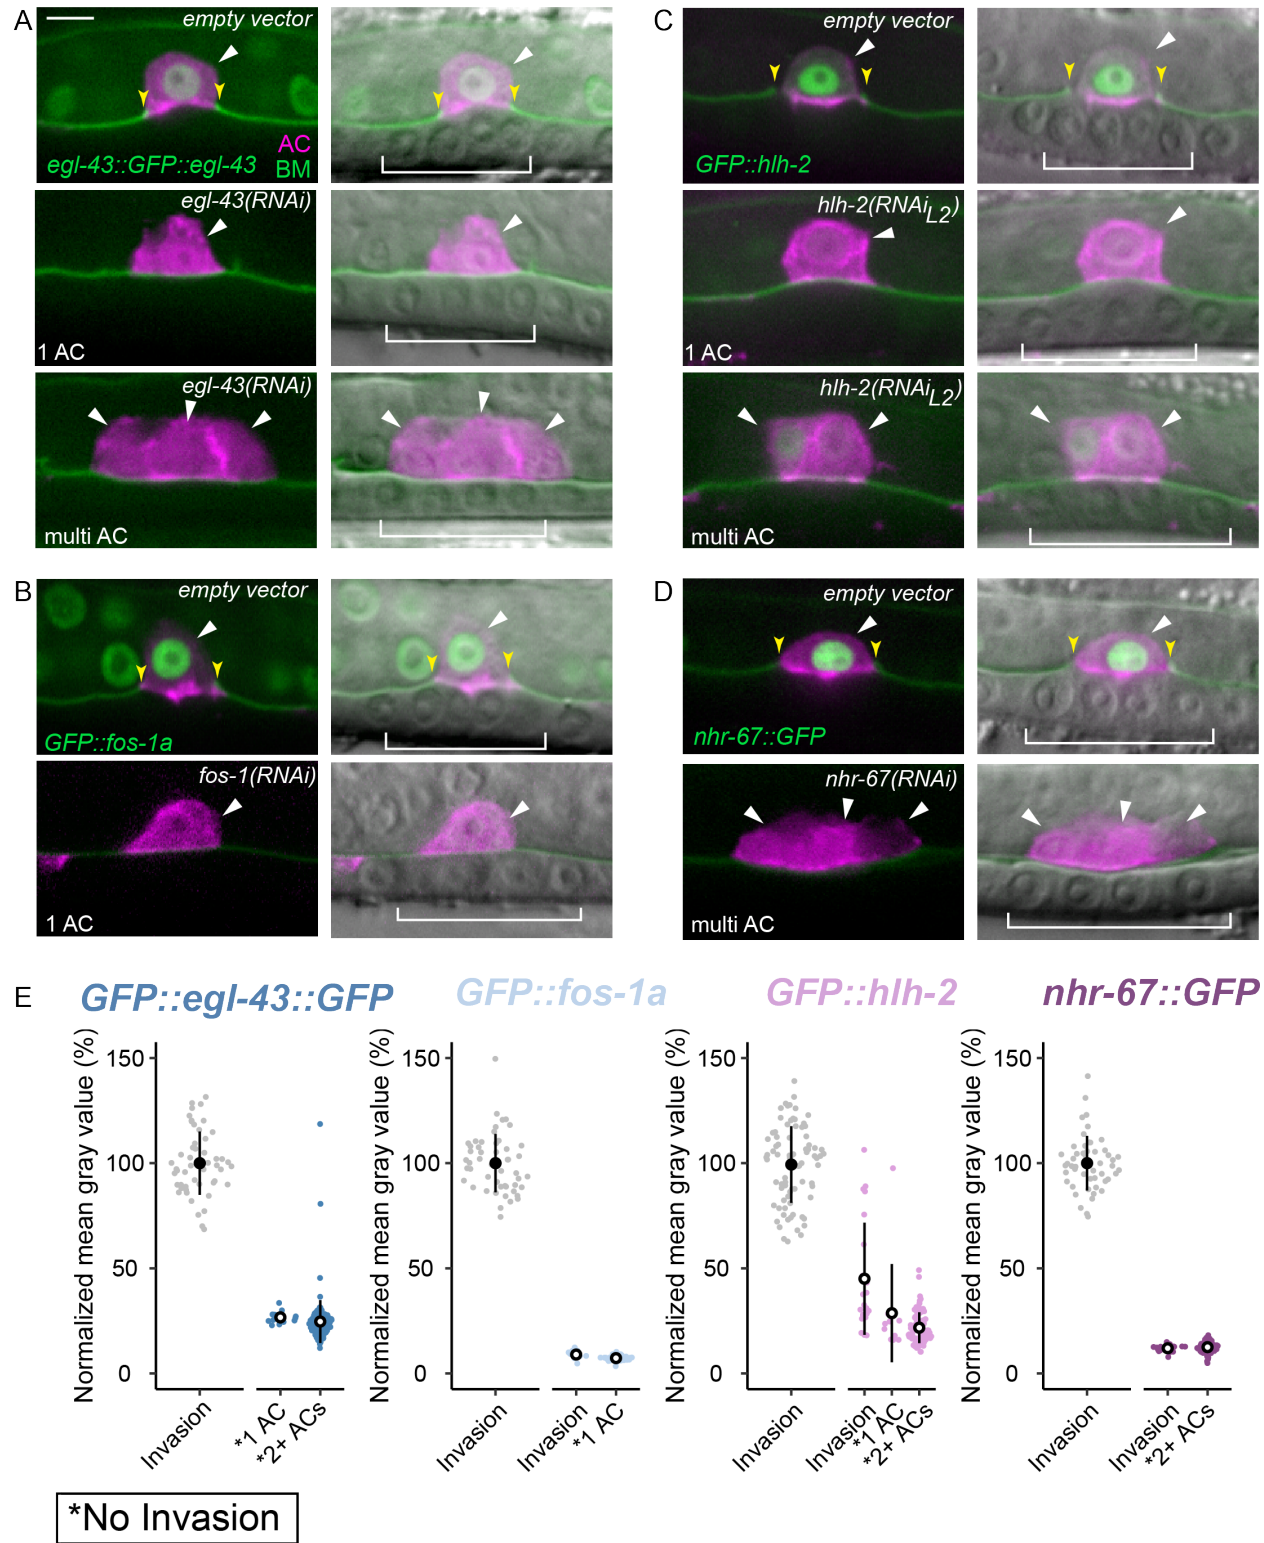

**Fig. 4. Quantification of TF-RNAi phenotype penetrance in relation to GFP**

**expression.** (A-D) Single planes of confocal z-stack depicting representative phenotype (single vs. multi AC, bottom left of each image) of fluorescence alone (left; AC, magenta, expressing *cdh-3*>mCherry::moeABD and BM, green) and DIC overlay (right). (E) Sina plots of GFP-tagged TF levels, defined as the mean gray value of individual AC nuclei following TF-RNAi knockdown. In this and all other figures, statistical significance as compared to empty vector controls is denoted as an open black circle and here represents a p-value of  $< 1 \times 10^{-6}$  by Student's t test ( $n \geq 50$  animals per treatment). Asterisk (\*) denotes quantification of animals with ACs (single or multi) that failed to invade.



**Figure 5**

Medwig-Kinney et al., 2019

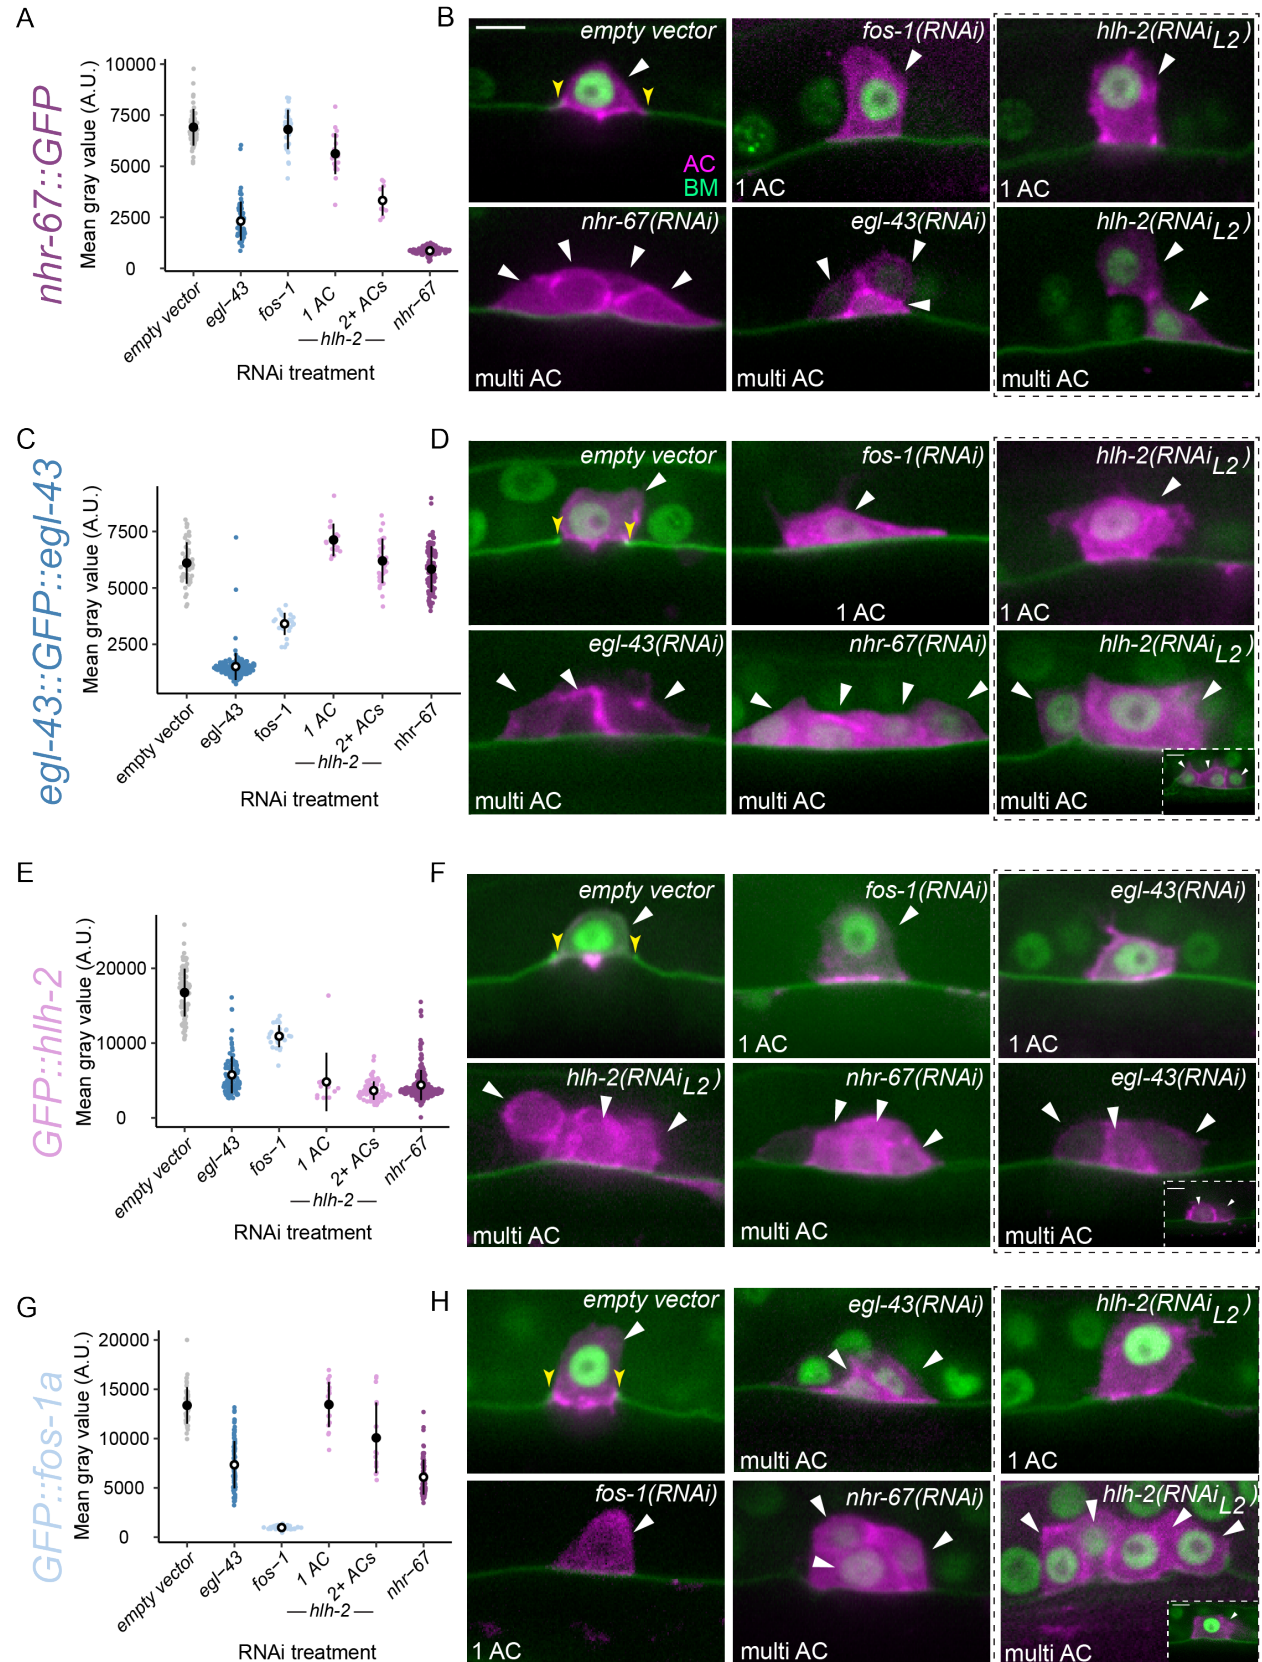

**Fig. 5. Regulatory interactions among pro-invasive TFs at endogenous loci.** (A, C, E,G) Sina plots of GFP-tagged TF levels, defined as the mean gray value of individual AC nuclei, following RNAi perturbation ( $n \geq 25$  animals per treatment). (B, D, F, H) Single planes of confocal z-stack depicting representative phenotypes (single vs. multi AC, as noted bottom left of each image) following TF depletion by RNAi, as denoted in the upper right of each image. Dashed boxes indicate representative images of single vs. multi AC phenotypes as a result of specific TF-RNAi treatments.

Figure 6

Medwig-Kinney et al., 2019

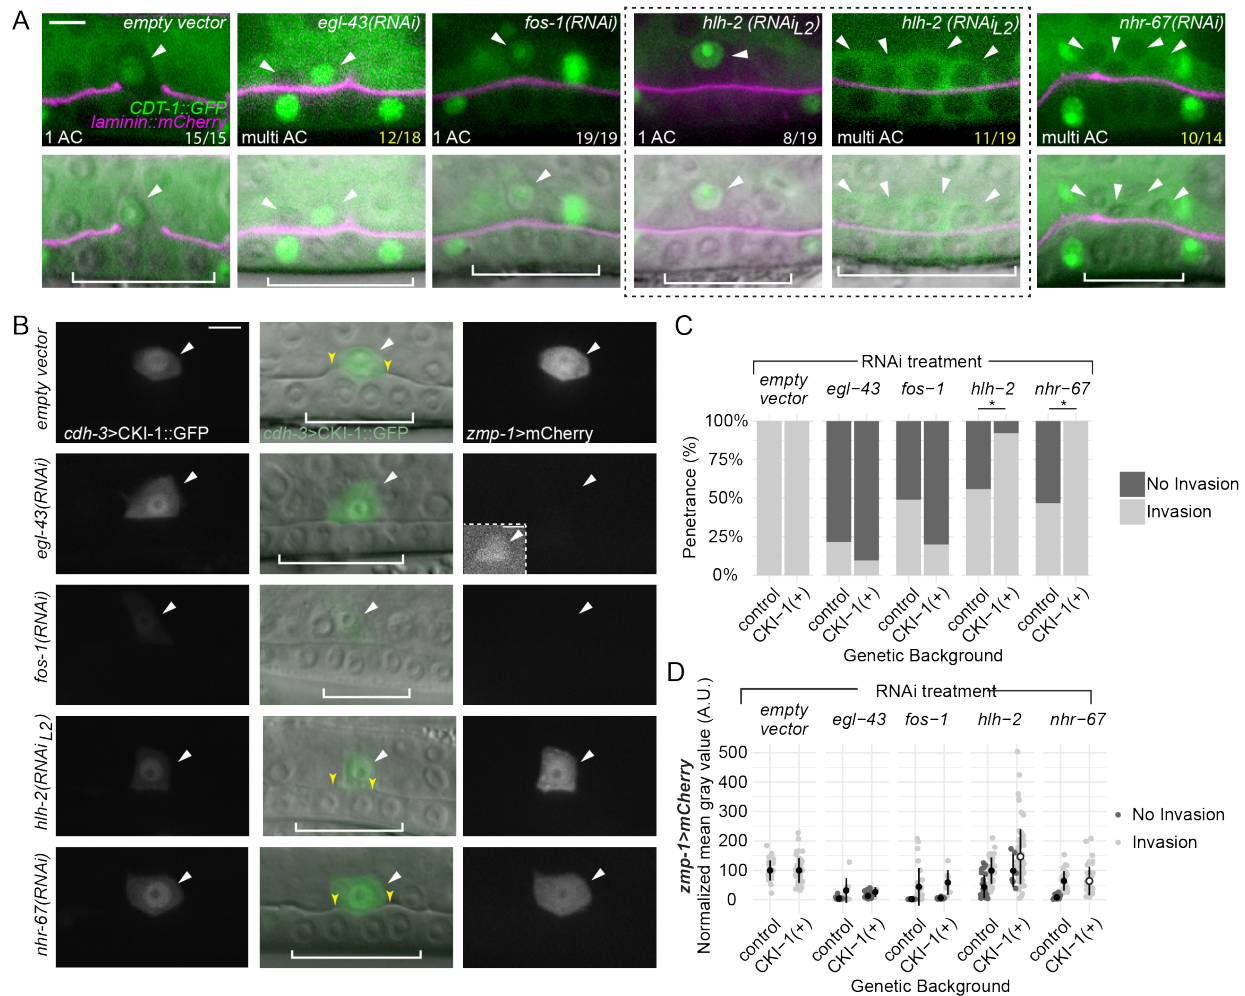

**Fig. 6. HLH-2 depletion is rescued by induced G1/G0 arrest while EGL-43 has a cell cycle-independent pro-invasive role.** (A) Localization of cell cycle state reporter, *cdt-1>CDT-1::GFP* (green) and BM (*lam-1>LAM-1::mCherry*, magenta) in empty vector control (left) as compared to TF-RNAi depletions (top: fluorescence alone, bottom: DIC overlays). White and yellow fractions (bottom right of each fluorescence micrograph) indicate number of occurrences of nuclear vs non-nuclear *cdt-1>CDT-1::GFP*, respectively. (B) Single confocal plane depicting localization of *cdh-3>CKI-1::GFP* (left), DIC overlay (middle), and *zmp-1>mCherry* expression (right) in empty vector control (top) and TF-RNAi depletions as indicated (left). (C) Stacked bar graph depicting penetrance of AC invasion defects in control animals lacking *cdh-3>CKI-1::GFP* as compared to CKI-1(+) animals. Asterisk (\*) denotes statistical significance between control and CKI-1(+) animals and represents a p-value < 0.00001 by Fisher's exact test

Medwig-Kinney, et al. (2019)

GRN for invasive differentiation

( $n \geq 27$  animals per treatment). (B) Sina plots depicting quantification of *zmp-1*>*mCherry* reporter levels in control and CKI-1(+) animals. Statistical significance represents a p-value of  $< 0.01$  by Student's t test ( $n \geq 27$  animals per treatment).



**Figure 7**

Medwig-Kinney et al., 2019

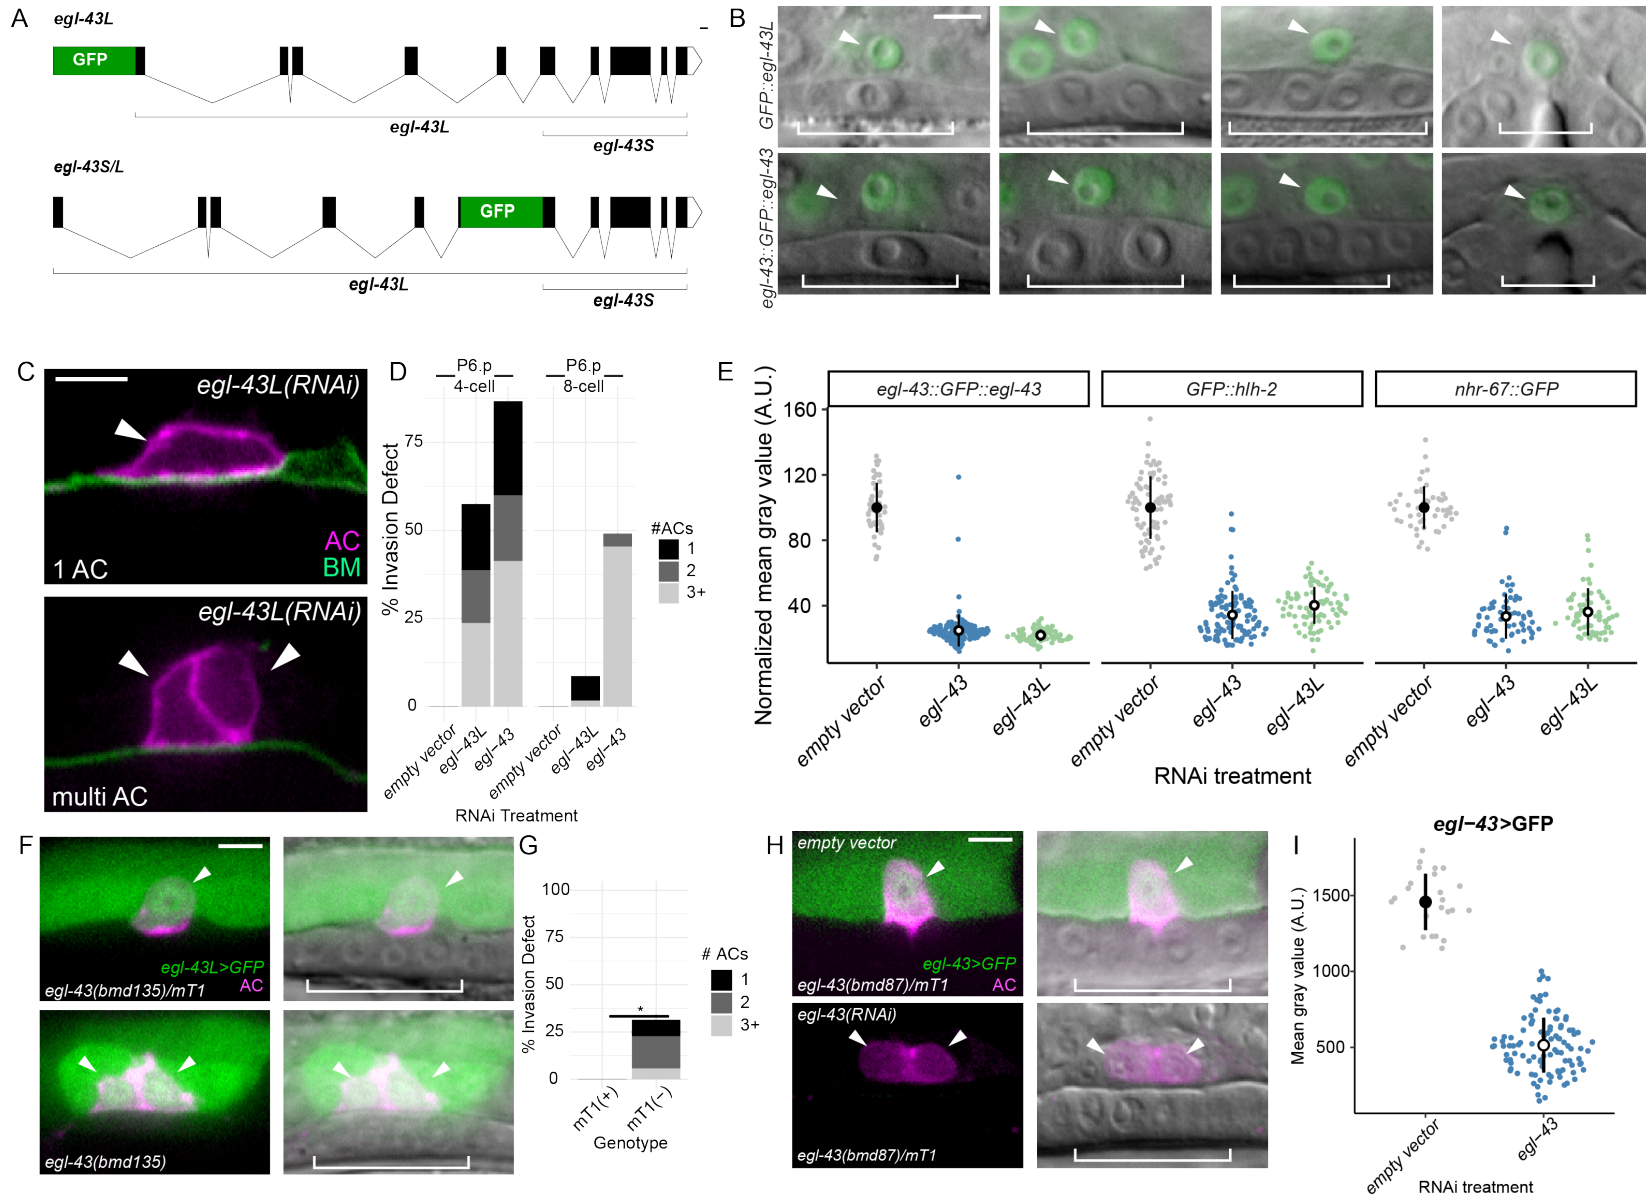

**Fig. 7. Both isoforms of *egl-43* function redundantly to regulate AC invasion. (A)**

Schematics (via <http://wormweb.org/exonintron>) of GFP insertion into the *egl-43* locus to tag the long (top) or both isoforms (bottom). Scale bar, 100bp. (B) DIC overlaid with single confocal plane for *GFP::egl-43L* (top) and *egl-43::GFP::egl-43* (bottom). (C) Single confocal plane depicting single AC (top) and multi AC phenotypes (bottom) following *egl-43L(RNAi)* treatment. The AC-specific membrane marker (magenta) and BM marker (green) are overlaid in each micrograph. (D) Stacked bar chart showing penetrance of invasion defects, binned by number of ACs. (E) Sina plots of GFP-tagged TF levels, defined as the mean gray value of individual AC nuclei, following RNAi perturbation ( $n \geq 25$  animals for each treatment) between RNAi treatments targeting *egl-43L* and *egl-43*. (F) Single plane of confocal z-stacks depicting representative micrographs of control (top) versus *egl-43(bmd135)* animals expressing *egl-43L>GFP* (green) and an AC reporter (magenta). (G) Stacked bar graph depicting penetrance of AC invasion defect. Asterisk (\*) denotes statistical significance between control and *mT1(-)* animals and represents a p-value  $< 0.0008$  by Fisher's exact test ( $n \geq 25$  animals per treatment). (H) Single plane depicting fluorescence micrographs (left) and DIC overlays (right) of balanced *egl-43(bmd87)/mT1* animals expressing endogenous *egl-43>GFP* (green) and an AC reporter (magenta). (I) Sina plots of *egl-43>GFP* levels, defined as the mean gray value of individual ACs, following RNAi perturbation ( $n \geq 25$  animals per treatment).

**Figure 8**

Medwig-Kinney et al., 2019

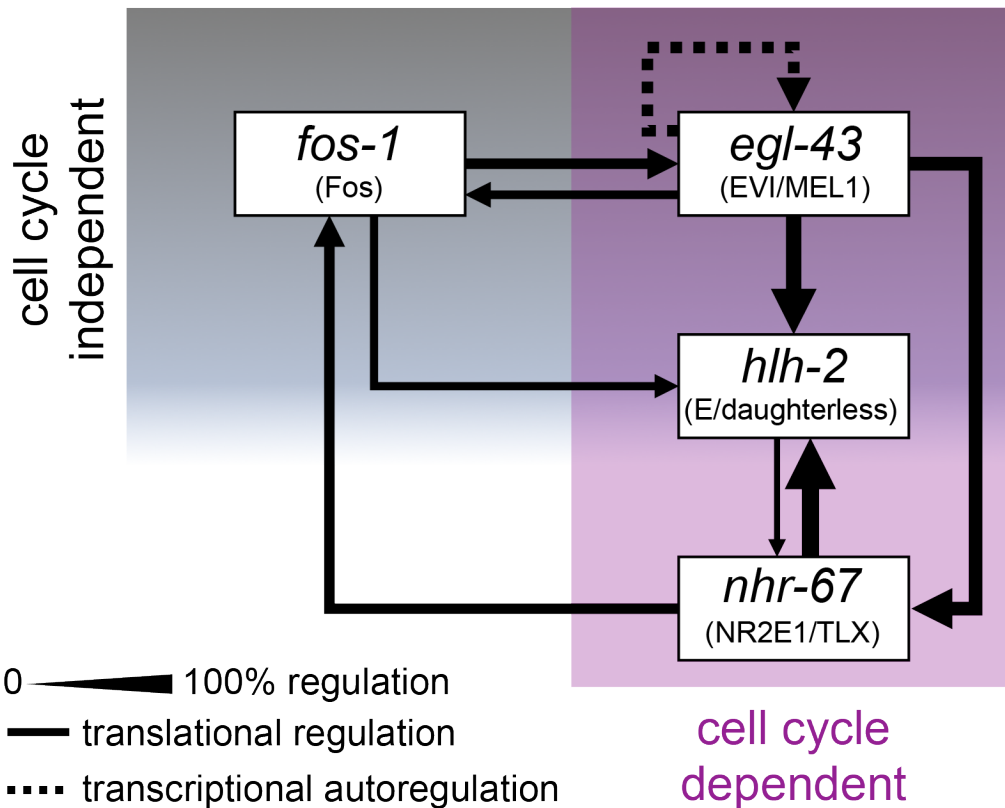

**Fig. 8. Summary model of the GRN coordinating AC invasion.** Network inference predicts cell cycle independent (gray shaded region) and dependent (purple shaded region) sub-circuits. The thickness of the arrow corresponds to strength of the regulatory interaction, determined by normalizing perturbation data to that of both positive and negative controls. Solid lines refer to regulation of protein levels, dotted line refers to transcriptional regulation.
